# Supplementary material
Source: PubMed Central journal article supplement (PMC7450408)
Supplement: jamacardiol-e203524-s002.pdf [file jamacardiol-e203524-s002.pdf]

## Supplementary Online Content

Golledge J, Pinchbeck J, Tomee SM, et al. Efficacy of telmisartan to slow growth of small abdominal aortic aneurysms: a randomized clinical trial. *JAMA Cardiol*. Published online August 26, 2020. doi:10.1001/jamacardio.2020.3524

**eTable 1.** Adherence to Allocated Medication

**eTable 2.** Effect of Telmisartan on Health-Related Quality of Life at the End of the Treatment Period

**eTable 3.** Effect of Telmisartan on Safety Outcomes

**eFigure 1.** Effect of Telmisartan on C-reactive Protein

**eFigure 2.** Lack of Interaction Between Initial AAA Diameter Grouping and Effect of Telmisartan on AAA Growth Measured With Ultrasound

**eFigure 3.** Effect of Telmisartan on Risk of AAA Repair or Death From AAA Rupture

**eFigure 4.** Effect of Telmisartan on Ankle Brachial Pressure Index

**eFigure 5.** Effect of Telmisartan on Short Form-36 Physical Component Score

**eFigure 6.** Effect of Telmisartan on Short Form-36 Mental Component Score

**eAppendix.** TEDY Team, Collaborating Sites, and Investigators

This supplementary material has been provided by the authors to give readers additional information about their work.

**eTable 1. Adherence to allocated medication**

| Time since randomization | Telmisartan         |                               | Placebo             |                               |
|--------------------------|---------------------|-------------------------------|---------------------|-------------------------------|
|                          | Number assessed (%) | Taking $\geq$ 80% tablets (%) | Number assessed (%) | Taking $\geq$ 80% tablets (%) |
| 3 Months                 | 83 (78)             | 77 / 83 (93)                  | 78 (77)             | 72 / 78 (92)                  |
| 6 Months                 | 79 (75)             | 72 / 79 (91)                  | 79 (78)             | 77 / 79 (97)                  |
| One Year                 | 72 (68)             | 66 / 72 (92)                  | 73 (72)             | 69 / 73 (95)                  |
| 18 Months                | 67 (63)             | 61 / 67 (91)                  | 63 (62)             | 58 / 63 (92)                  |
| Two Years                | 76 (72)             | 68 / 76 (89)                  | 68 (67)             | 62 / 68 (91)                  |

Treatment adherence assessed by pill counting. Table shows the number of participants who had capsules counted, and the proportion who were taking  $\geq$ 80% of the study medications.

**eTable 2. Effect of telmisartan on health-related quality of life at the end of the treatment period**

| <b>SF-36 outcome</b>      | <b>Telmisartan<br/>(n=106)</b> | <b>Placebo<br/>(n=101)</b> | <b>Mean difference<br/>(95% CI)</b> | <b>p-value*</b> |
|---------------------------|--------------------------------|----------------------------|-------------------------------------|-----------------|
| Physical functioning      | 66.1 (2.7)                     | 64.8 (2.8)                 | -1.3 (-1.3 to -1.3)                 | 0.731           |
| Role physical             | 74.1 (3.0)                     | 75.6 (2.7)                 | 1.5 (1.5 to 1.5)                    | 0.708           |
| Bodily pain               | 72.8 (2.7)                     | 74.6 (2.6)                 | 1.8 (1.8 to 1.8)                    | 0.630           |
| General health            | 61.5 (2.1)                     | 64.5 (2.1)                 | 2.9 (2.9 to 2.9)                    | 0.329           |
| Vitality                  | 60.3 (2.0)                     | 62.7 (2.0)                 | 2.4 (2.4 to 2.4)                    | 0.392           |
| Social functioning        | 84.4 (2.1)                     | 84.5 (2.2)                 | 0.1 (0.1 to 0.1)                    | 0.975           |
| Role emotional            | 75.6 (2.6)                     | 74.4 (2.6)                 | -1.1 (-1.1 to -1.1)                 | 0.758           |
| Mental health             | 80.4 (1.4)                     | 81.0 (1.6)                 | 0.6 (0.6 to 0.6)                    | 0.782           |
| Physical component score† | 43.9 (1.0)                     | 44.2 (1.0)                 | 0.4 (0.4 to 0.4)                    | 0.802           |
| Mental component score†   | 51.9 (0.8)                     | 52.3 (0.9)                 | 0.4 (0.4 to 0.4)                    | 0.732           |

Shown are mean (SD) SF-36 health-related quality of life scores at the end of the trial by allocated treatment group. Missing data were imputed using the last observation carried forward method.  
 \*Calculated using t-test comparing means at 24 months.  
 †The physical- and mental- component summary scores are based on the weighted T-scores of the four physical and mental SF-36 scales, respectively. The raw SF-36 component summary scores were transformed to a norm-based T-score with a mean ( $\pm$ SD) score of 50 $\pm$ 10 in the general population (higher scores indicate a better quality of life).

**Table 3. Effect of telmisartan on safety outcomes**

| <b>Assessment</b>                                                                                                                                                                                                                                | <b>Telmisartan<br/>(n=106)</b> | <b>Placebo<br/>(n=101)</b> | <b><i>p</i>-value<sup>a</sup></b> |
|--------------------------------------------------------------------------------------------------------------------------------------------------------------------------------------------------------------------------------------------------|--------------------------------|----------------------------|-----------------------------------|
| Any adverse event                                                                                                                                                                                                                                | 65 (61)                        | 58 (57)                    | 0·575                             |
| Hospitalization                                                                                                                                                                                                                                  | 27 (25)                        | 33 (33)                    | 0·285                             |
| Death                                                                                                                                                                                                                                            | 2 (2)                          | 6 (6)                      | 0·162                             |
| Syncope or hypotensive symptoms                                                                                                                                                                                                                  | 28 (26)                        | 13 (13)                    | <b>0·015</b>                      |
| Cough                                                                                                                                                                                                                                            | 1 (1)                          | 5 (5)                      | 0·112                             |
| Gastrointestinal symptoms                                                                                                                                                                                                                        | 6 (6)                          | 4 (4)                      | 0·749                             |
| Angioedema                                                                                                                                                                                                                                       | 0 (0)                          | 0 (0)                      | ·                                 |
| End-stage renal disease                                                                                                                                                                                                                          | 0 (0)                          | 0 (0)                      | ·                                 |
| <p>Values shown are frequency (%). Only the first adverse event for each participant was counted. Percentages may not total 100 because of rounding.</p> <p><sup>a</sup>Calculated using Fisher's exact test to account for low frequencies.</p> |                                |                            |                                   |

eFigure 1. Effect of telmisartan on C-reactive protein

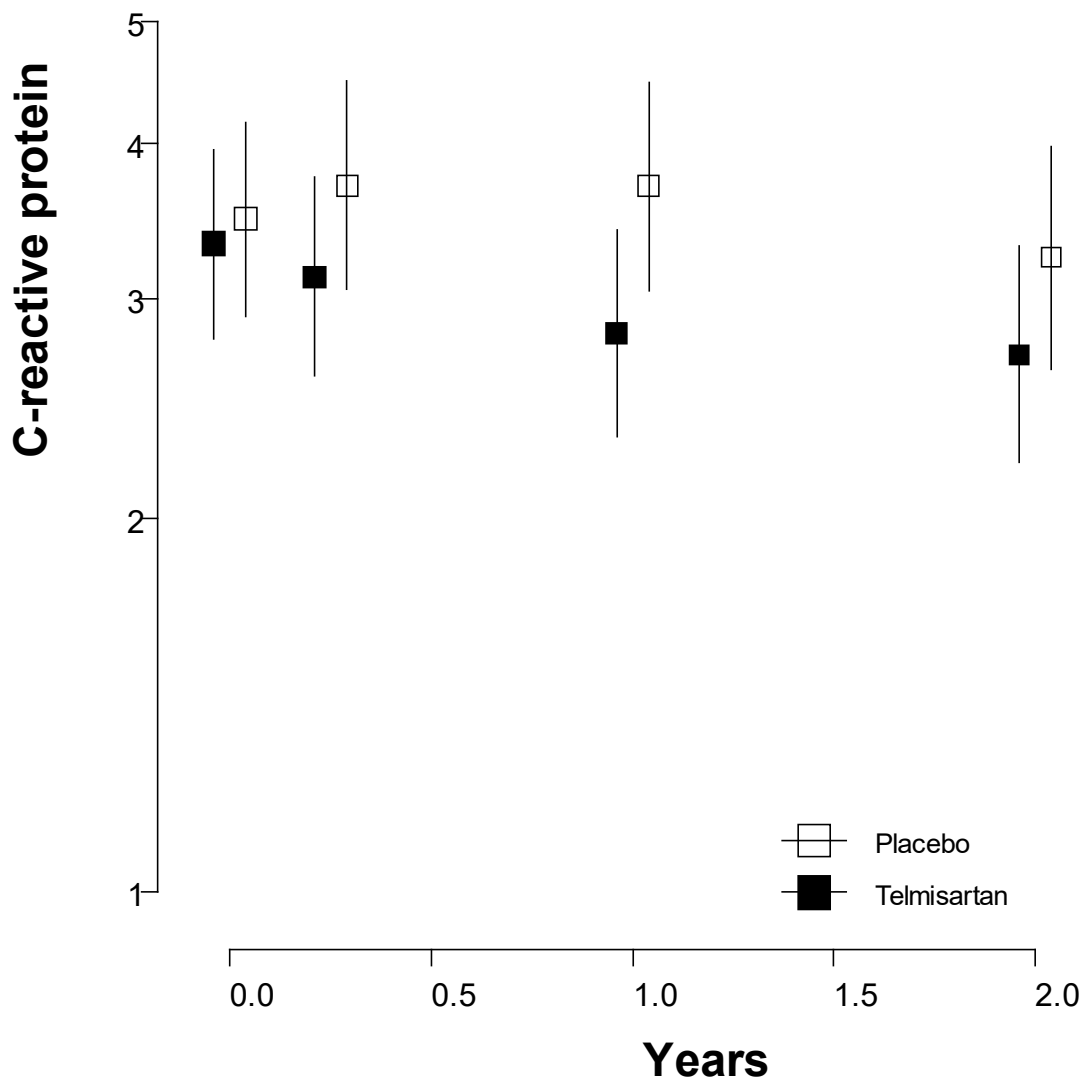

**Number assessed**

|             |     |    |    |    |
|-------------|-----|----|----|----|
| Placebo     | 101 | 83 | 83 | 73 |
| Telmisartan | 106 | 93 | 85 | 78 |

**eFigure 2: Lack of interaction between initial AAA diameter grouping and effect of telmisartan on AAA growth measured with ultrasound**

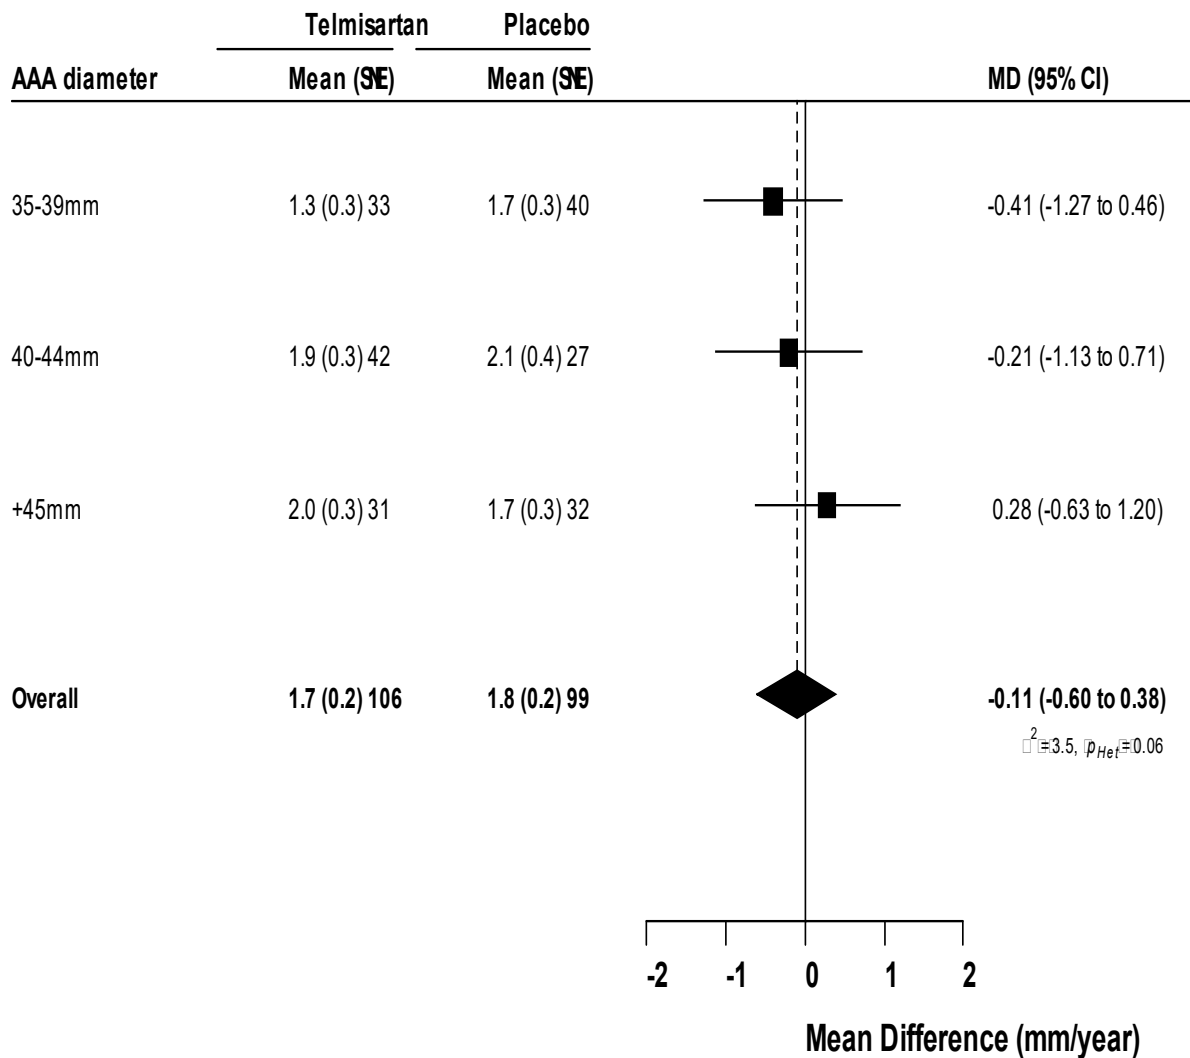

Effects of telmisartan vs placebo on AAA growth by baseline ultrasound diameter. The mean difference for each group is the average difference in annual AAA growth rates between randomly allocated groups (intention-to-treat). Box areas are inversely proportional to the variance within each group. AAA, abdominal aortic aneurysm; SE, standard error; MD, mean difference; CI, confidence interval.

eFigure 3: Effect of telmisartan on risk of AAA repair or death from AAA rupture

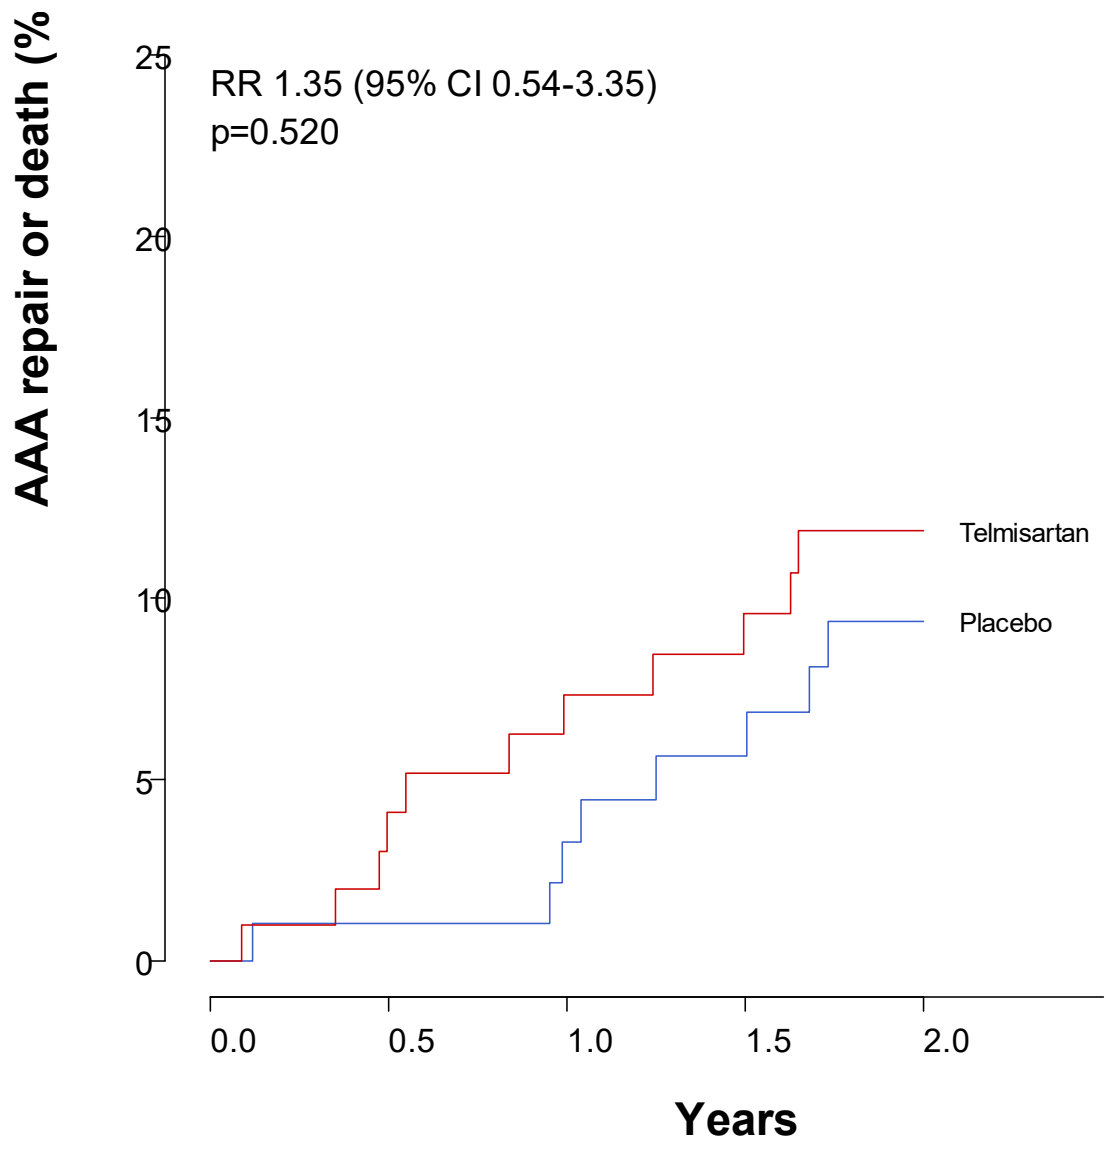

| At risk     |     |    |    |    |    |
|-------------|-----|----|----|----|----|
| Placebo     | 101 | 93 | 84 | 77 | 48 |
| Telmisartan | 100 | 91 | 86 | 80 | 52 |

Kaplan-Meier illustration of the risk of a first AAA-related event (composite of AAA repair or AAA-related mortality) among participants allocated to telmisartan or placebo. Follow-up was continued up until two years. The number of patients at risk at the start of each six months of follow-up are shown below the graph.

Figure 4. Effect of telmisartan on ankle brachial pressure index

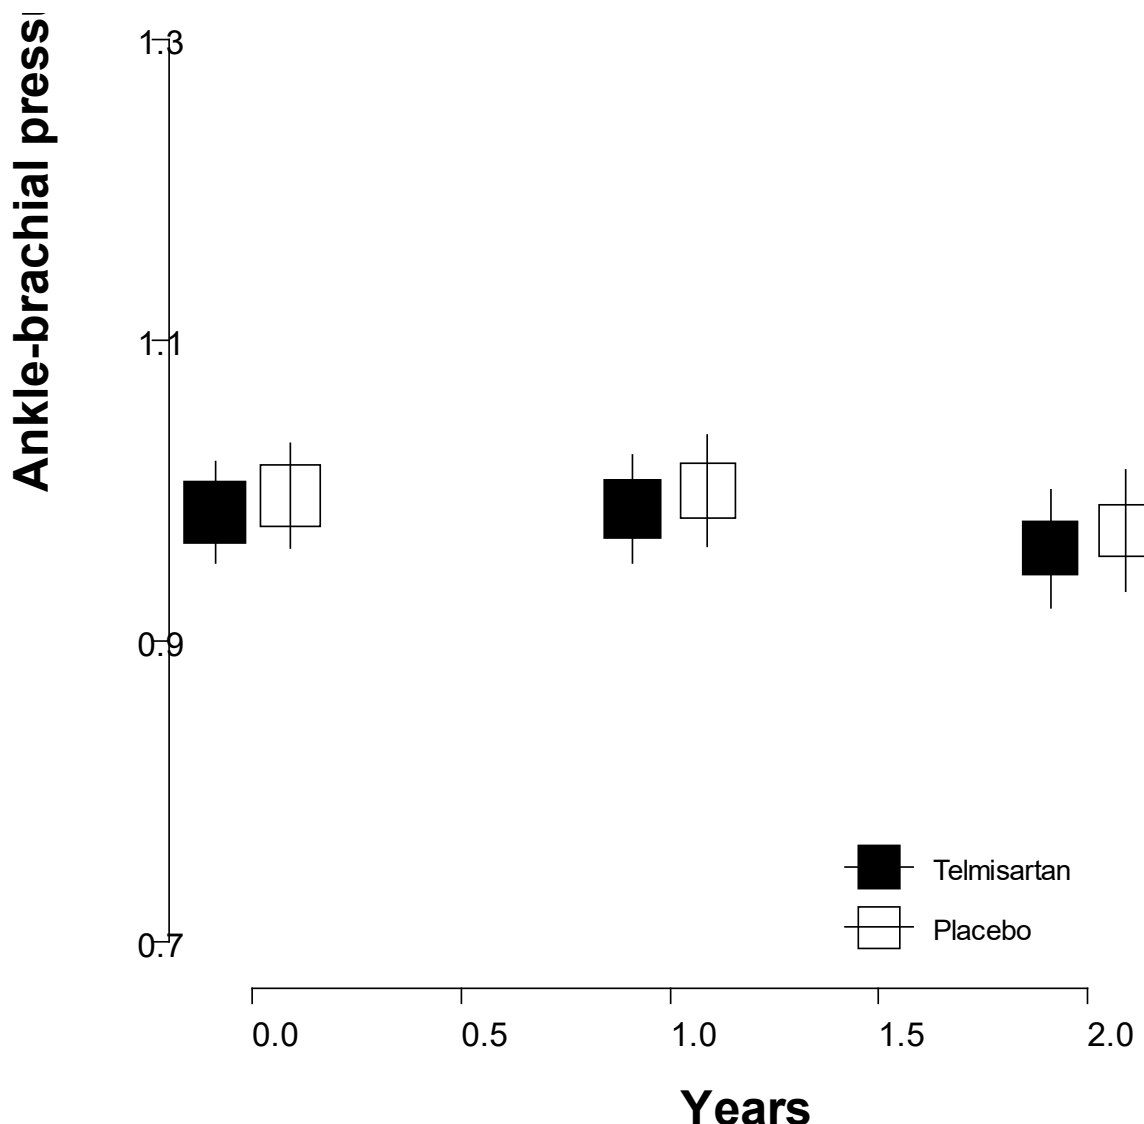

| Number assessed |     |    |    |
|-----------------|-----|----|----|
| Telmisartan     | 105 | 85 | 77 |
| Placebo         | 97  | 79 | 70 |

Ankle brachial pressure index (ABI) calculated as the highest of the dorsalis pedis or posterior tibial artery Doppler pressure divided by the brachial artery Doppler pressure. Representative ABI taken as the lowest ABI of both lower limbs. Incompressible ABIs (>1.4) not included. I bars represent 95% CI. No significant difference in rate of change of ABI (p = 0.959).



Figure 5. Effect of telmisartan on Short Form-36 physical component score

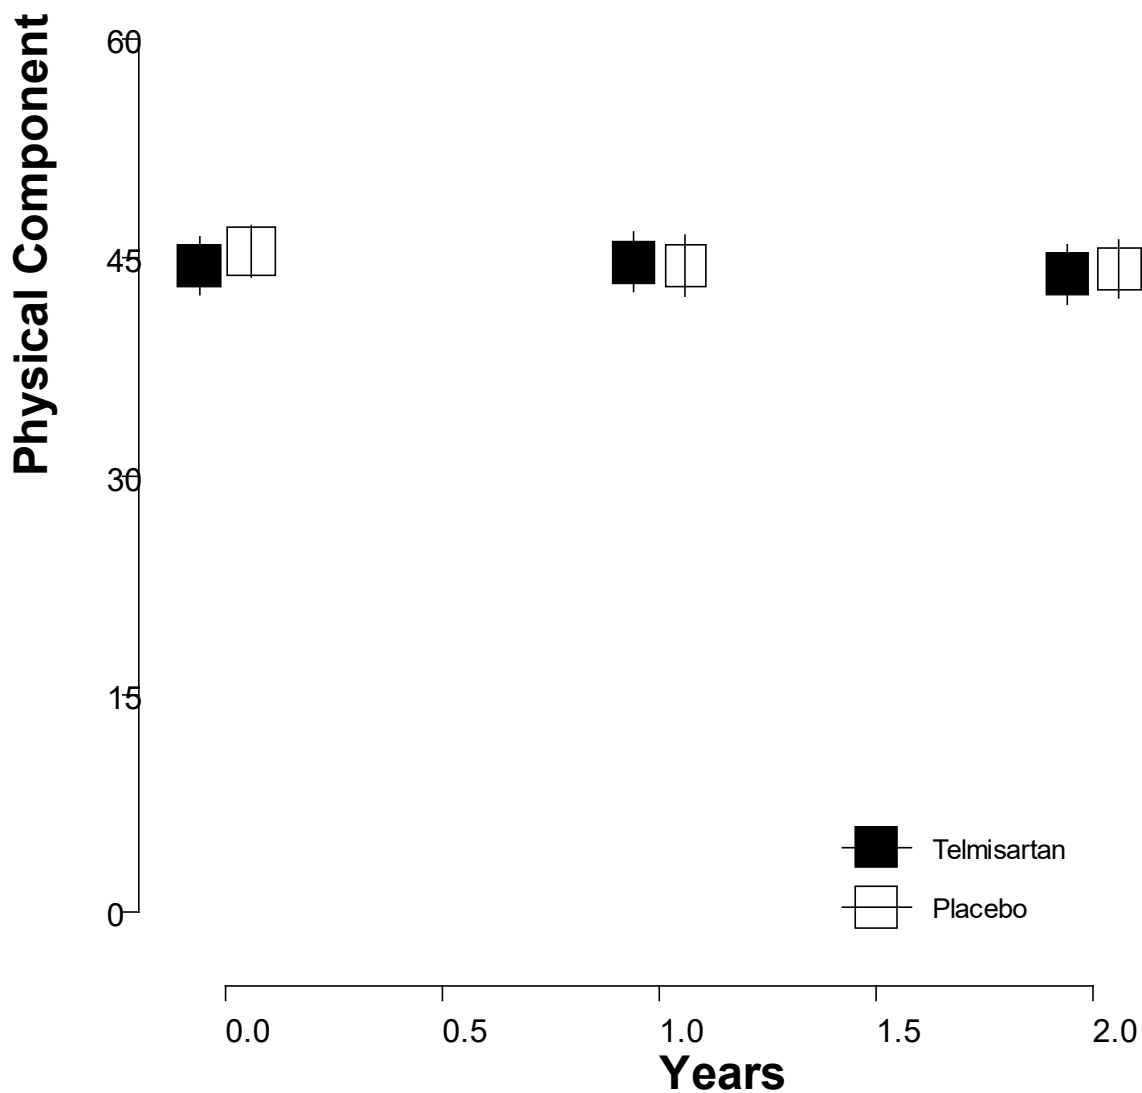

**Numbers assessed**

|             |     |    |    |
|-------------|-----|----|----|
| Telmisartan | 106 | 85 | 80 |
| Placebo     | 101 | 81 | 73 |

Shown is the mean SF-36 summary score for each randomized group at baseline and at subsequent study visits (numbers shown below graph). Missing data were imputed using the last value carried forward method.

Figure 6. Effect of telmisartan on Short Form-36 mental component score

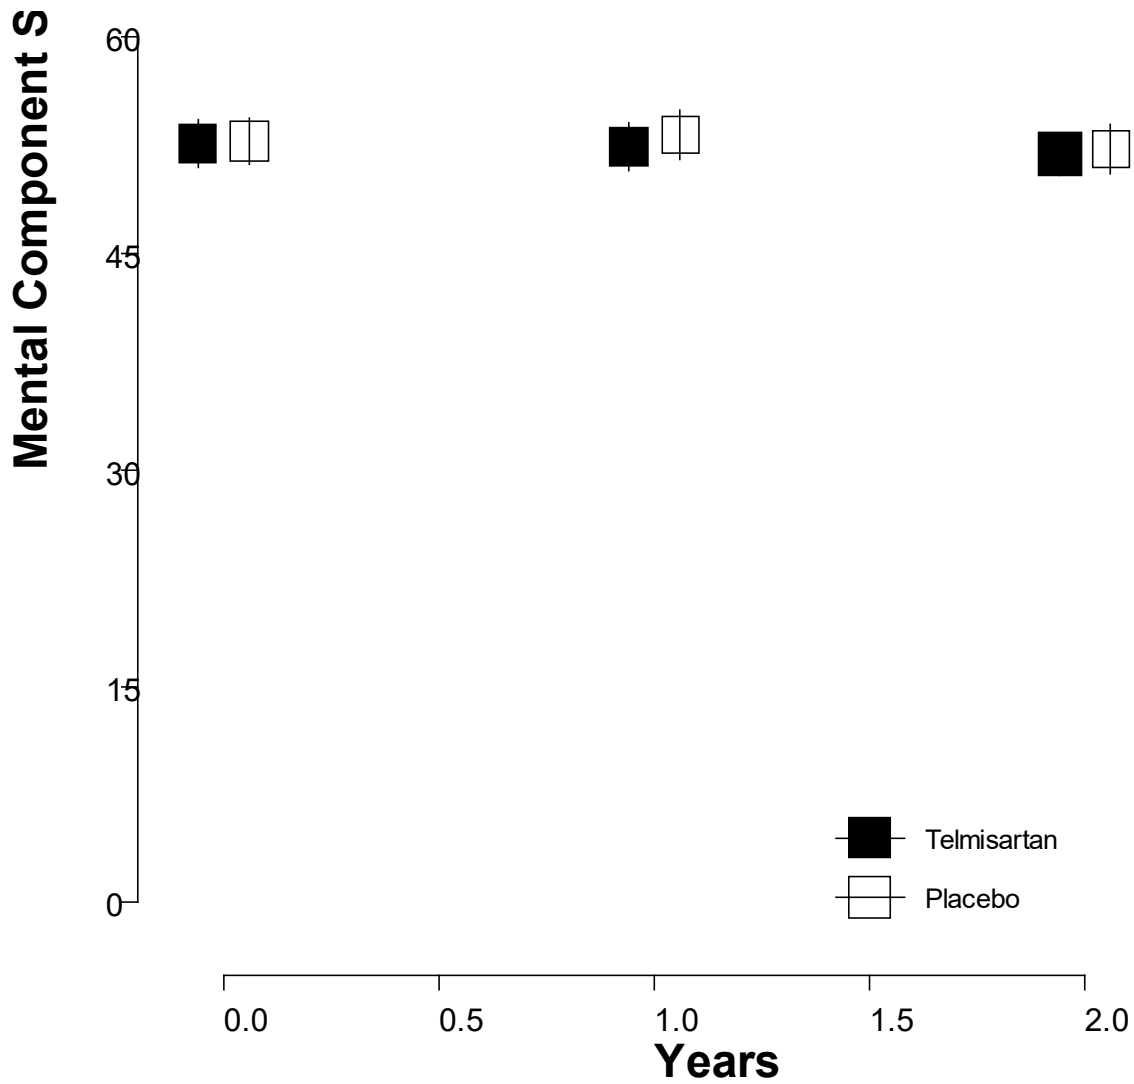

**Numbers assessed**

|             |     |    |    |
|-------------|-----|----|----|
| Telmisartan | 106 | 85 | 80 |
| Placebo     | 101 | 81 | 73 |

Shown is the mean SF-36 summary score for each randomized group at baseline and at subsequent study visits (numbers shown below graph). Missing data were imputed using the last value carried forward method.

## **eAppendix. TEDY Team, Collaborating Sites and Investigators**

### **Independent trial randomisation**

Chris Reid, Monash and Curtin University, Australia

### **Data and safety monitoring board**

John Walsh, South Australia

Andrew Tonkin, Victoria

Cindy Sealey, Queensland

### **Trial executive committee**

Jonathan Golledge, Queensland

Rene Jaeggi, Queensland

Paul Norman, Western Australia

Sophie Rowbotham, Queensland

Jenna Pinchbeck, Queensland

### **Data quality oversight and checking**

Cindy Sealey, Queensland

Rene Jaeggi, Queensland

Tejas Singh, Queensland

Joseph Moxon, Queensland

Jonathan Golledge, Queensland

### **Data analysis**

Dylan Morris, Queensland

### **Core Imaging Laboratory**

Jenna Pinchbeck, Queensland

Georgina Anderson, Queensland

### **Recruitment sites**

#### **Australia**

##### **Gosford Vascular Services, New South Wales**

Principal Investigator Dr Bernie Bourke

Trial Coordinator Dr Michael Bourke

##### **Queen Elizabeth Hospital, Adelaide, South Australia**

Principal Investigator Professor Robert Fitridge

Trial Coordinators Ms Ruth Battersby and Dr. Prue Cowled

##### **Royal Brisbane and Women's Hospital, Queensland**

Principal Investigator Professor Jason Jenkins

Trial Coordinator Dr Sophie Rowbotham and Dr Brad Stefanovic

##### **The Townsville University Hospital and the Mater Hospital Pilmico, Queensland**

Principal Investigators Professor Jonathan Golledge and Dr Frank Quigley

Trial Coordinators Ms Jenna Pinchbeck and Ms Barbara Bradshaw

#### **The Netherlands**

Trial Coordinator Ms Stephanie Tomee

##### **Leiden University Medical Centre, Leiden**

Principal Investigators Associate Professor Jan Lindeman and Prof. Jaap F. Hamming

##### **Jeroen Bosch Hospital, Hertogenbosch**

Principal Investigator Dr. Jan Willem Hinnen

##### **Deventer ziekenhuis**

Principal Investigator Dr Robert B van Tongeren

##### **Haga Ziekenhuis, Den Haag**

Principal Investigator Dr. Jan J Wever

##### **Haaglanden Medisch Centrum, Den Haag**

Principal Investigator Dr. Daniël Eefting

##### **Sint Franciscus Gasthuis en Vlietland, Rotterdam**

Principal Investigator Dr. Jerome P van Brussel,

##### **Antonius Ziekenhuis Nieuwegein**

Principal Investigator Dr. Jean-Paul de Vries (current address: University Medical Center Groningen)

##### **Elisabeth Tweesteden Ziekenhuis, Tilburg**

Principal Investigator Dr. Patrick W. Vriens

#### **The United States of America**

##### **Veterans Administration Hospital and Stanford University, Palo Alto, California**

Principal Investigators Professor Ron Dalman and Dr. Oliver A. Aalami

Trial Coordinator Ms Lori McDonnell
