# Supplementary material
Source: PubMed Central journal article supplement (PMC7450408)
Supplement: jamacardiol-e203524-s003.pdf [file jamacardiol-e203524-s003.pdf]

# Data Sharing Statement

Golledge. Efficacy of Telmisartan to Slow Growth of Small Abdominal Aortic Aneurysms. *JAMA Cardiol.* Published August 26, 2020.  
10.1001/jamacardio.2020.3524

## Data

**Data available:** Yes

**Data types:** Other (please specify)

**Additional Information:** De-identified analyses compatible with participant consents, ethics and institutional agreements can be requested from the corresponding author.

**How to access data:** De-identified analyses compatible with participant consents, ethics and institutional agreements can be requested from the corresponding author.

**When available:** With publication

## Supporting Documents

**Document types:** Other (please specify)

**Additional Information:** supplementary data file we have provided

**How to access documents:** these have been uploaded

**When available:** With publication

## Additional Information

**Who can access the data:** these have been uploaded with the submission

**Types of analyses:** these have been uploaded with the submission

**Mechanisms of data availability:** these have been uploaded with the submission
